# Supplementary material
Source: PubMed Central journal article supplement (PMC3869966)

a

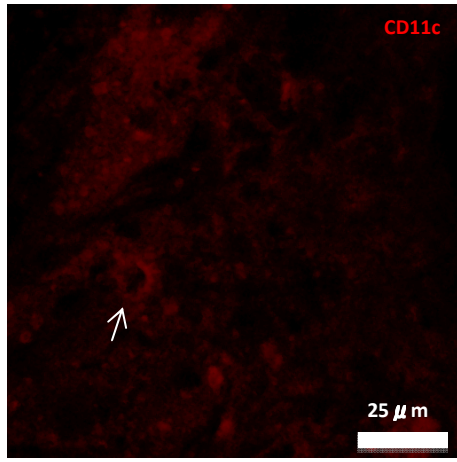

b

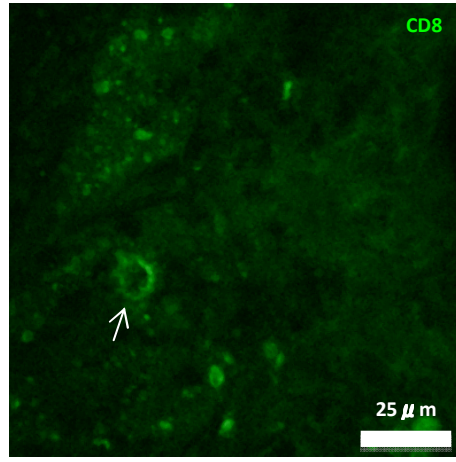

c

Suppl Fig. 1

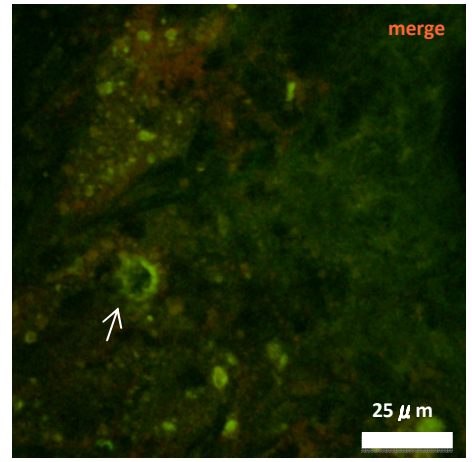

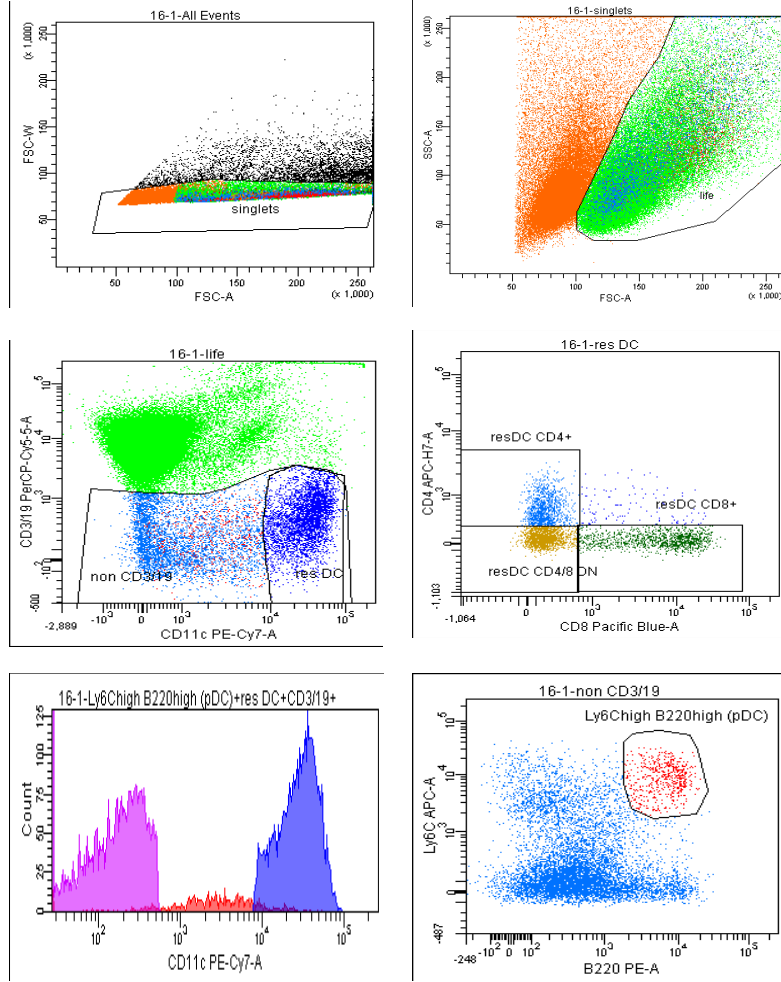

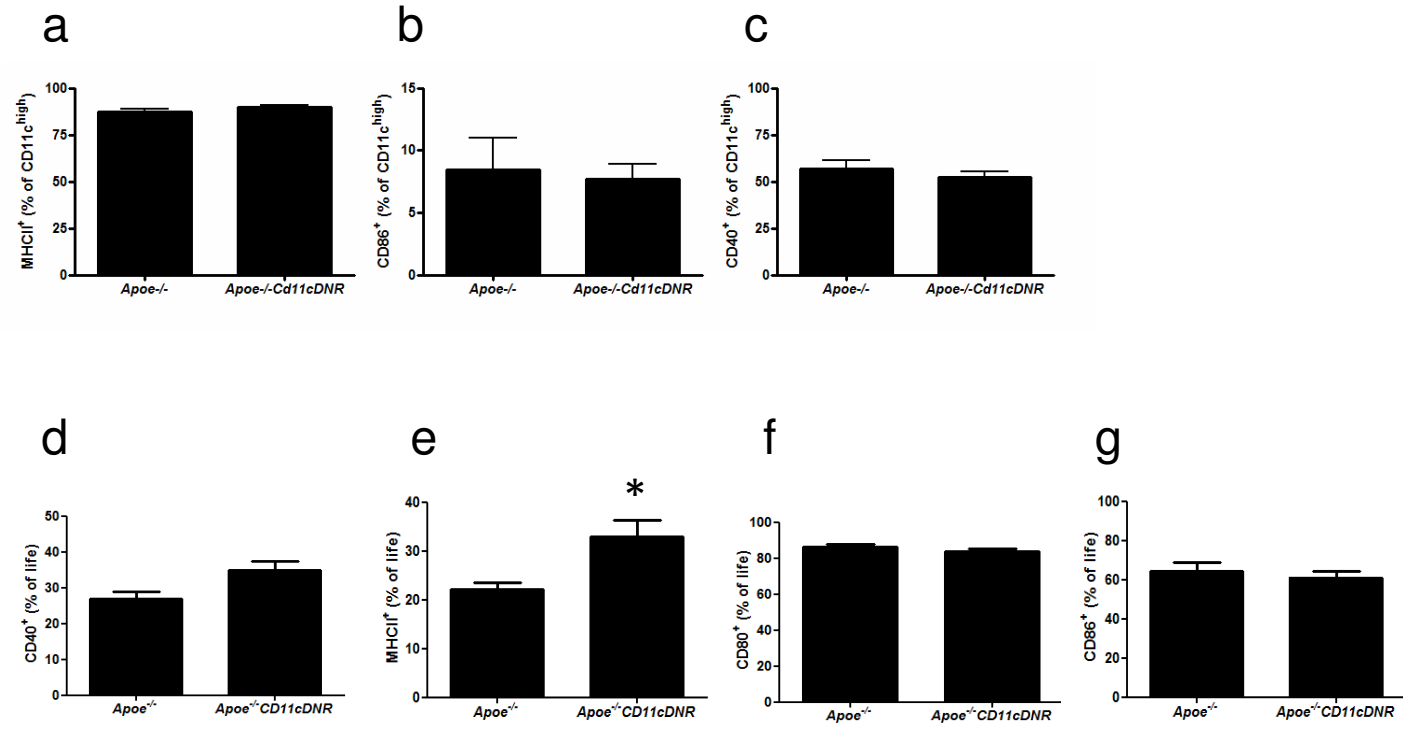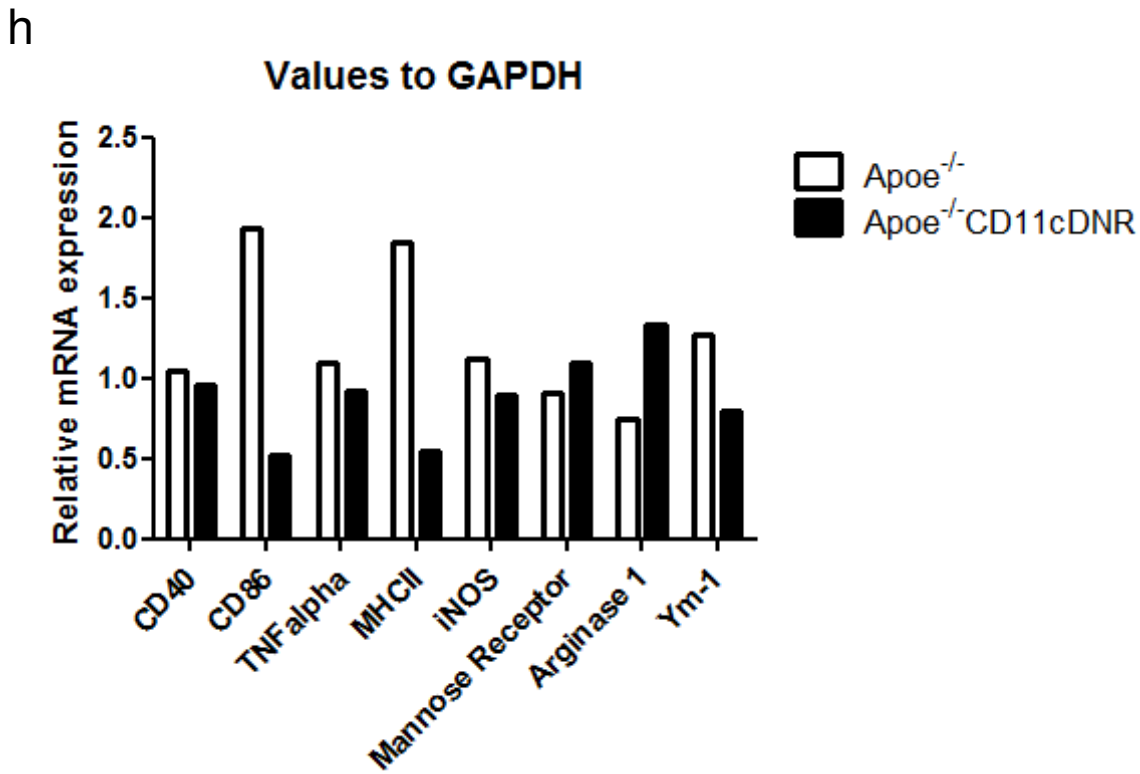

a

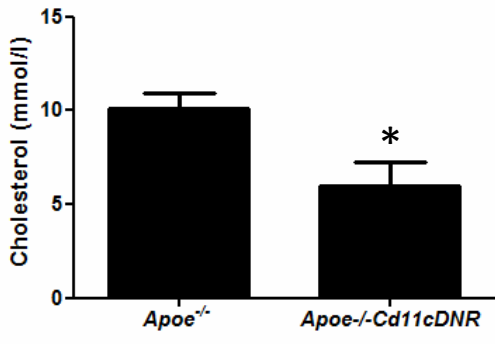

b

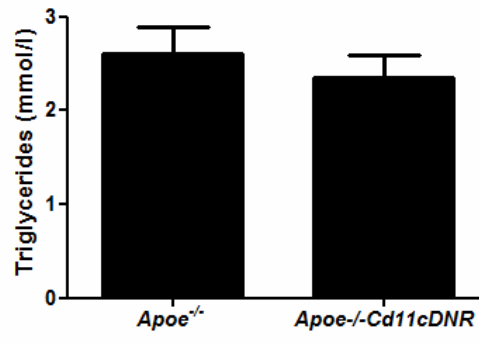

c

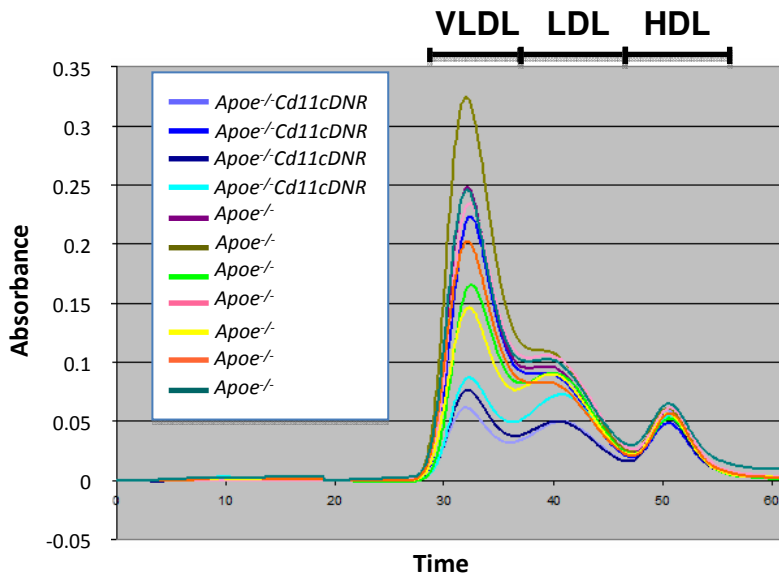

Supplement: supp_ehs106_ehs106supp_fig.pdf [file supp_ehs106_ehs106supp_fig.pdf]
